# Supplementary material
Source: ML conference proceedings conference paper supplement (https://openreview.net/forum?id=6iM7mmVhXh)
Supplement: supplementary_material [file attachment]

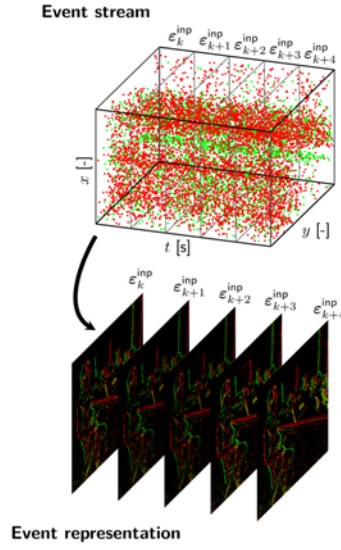

Figure 1: Discretization of a continuous temporal stream of external input events, and encoding into frames. Source of the image is [1].

---

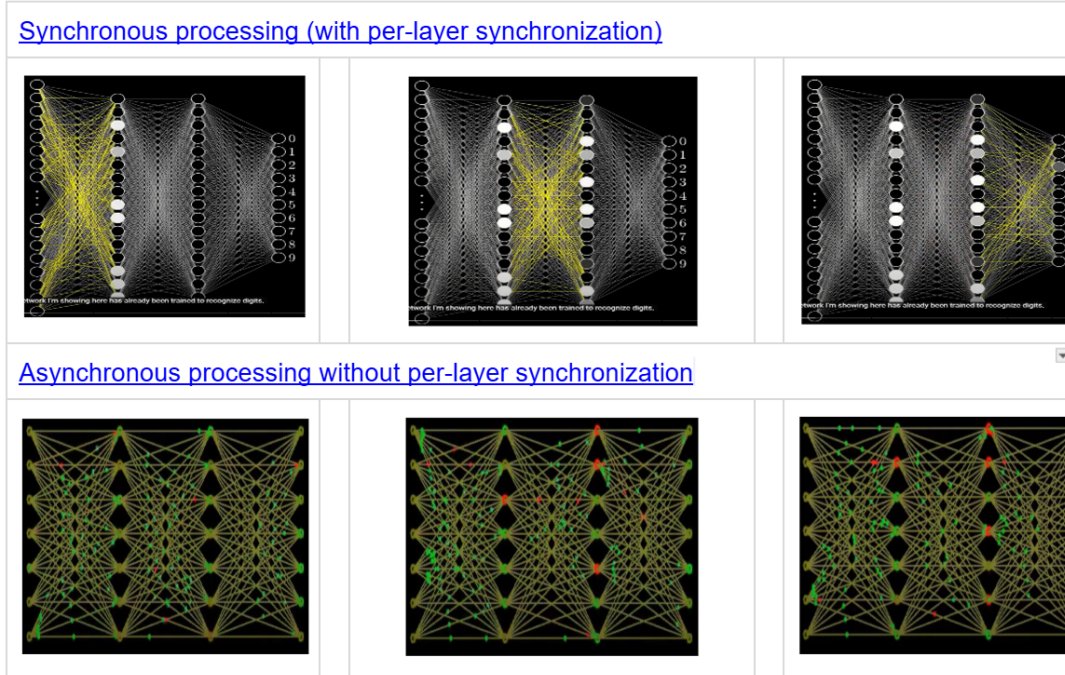

Figure 2: Layer synchronized processing compared to asynchronous processing. These are snapshots from full animations that can be found here: [https://anonymous.4open.science/r/AsyncInf-ICLR/Sync\\_inference.mp4](https://anonymous.4open.science/r/AsyncInf-ICLR/Sync_inference.mp4) for layer synchronized processing, and [https://anonymous.4open.science/r/AsyncInf-ICLR/Async\\_inference.mp4](https://anonymous.4open.science/r/AsyncInf-ICLR/Async_inference.mp4) for asynchronous processing.

---

## References

- [1] Jesse Hagenaaars, Federico Paredes-Vallés, and Guido de Croon. “Self-Supervised Learning of Event-Based Optical Flow with Spiking Neural Networks”. In: *Advances in Neural Information Processing Systems* 34 (2021).
